# Supplementary material for: The effects of VEGF-centered biomimetic delivery of growth factors on bone regeneration
Source: Royal Society of Chemistry journal article supplement (doi:10.1039/d1bm00245g), 2021-01-01
Supplement: d1bm00245g1.pdf [file d1bm00245g1.pdf]

**Supplementary Information for**

**The effects of VEGF-centered biomimetic delivery of growth factors on bone regeneration**

**Ho Yong Kim<sup>†a</sup>, Jin-Ho Park,<sup>†b,c</sup> Min Ji Kim<sup>a</sup>, Jin Ho Lee<sup>d</sup>, Se Heang Oh<sup>\*\*a</sup> and**

**June-Ho Byun<sup>\*b,c</sup>**

*<sup>a</sup>Department of Nanobiomedical Science, Dankook University, Cheonan 31116, Republic of Korea. E-mail: seheangoh@dankook.ac.kr*

*<sup>b</sup>Department of Oral and Maxillofacial Surgery, Gyeongsang National University School of Medicine, Gyeongsang National University Hospital, Institute of Health Sciences, Gyeongsang National University, Jinju, 52828, Republic of Korea.*

*E-mail: surbyun@gnu.ac.kr*

*<sup>c</sup>Department of Convergence Medical Science, Gyeongsang National University School of Medicine, Gyeongsang National University Hospital, Institute of Health Sciences, Gyeongsang National University, Jinju, 52828, Republic of Korea.*

*<sup>d</sup>Department of Advanced Materials, Hannam University, Daejeon 34054, Republic of Korea,*

<sup>†</sup>These authors contributed equally to this work.

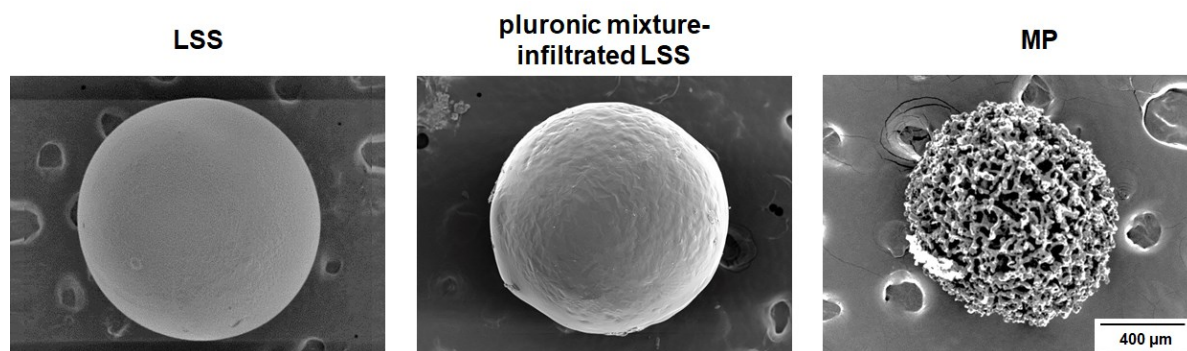

**Fig. S1** SEM photographs showing the gross appearance of LSS particle, pluronic mixture-infiltrated LSS particle, and MP particle.

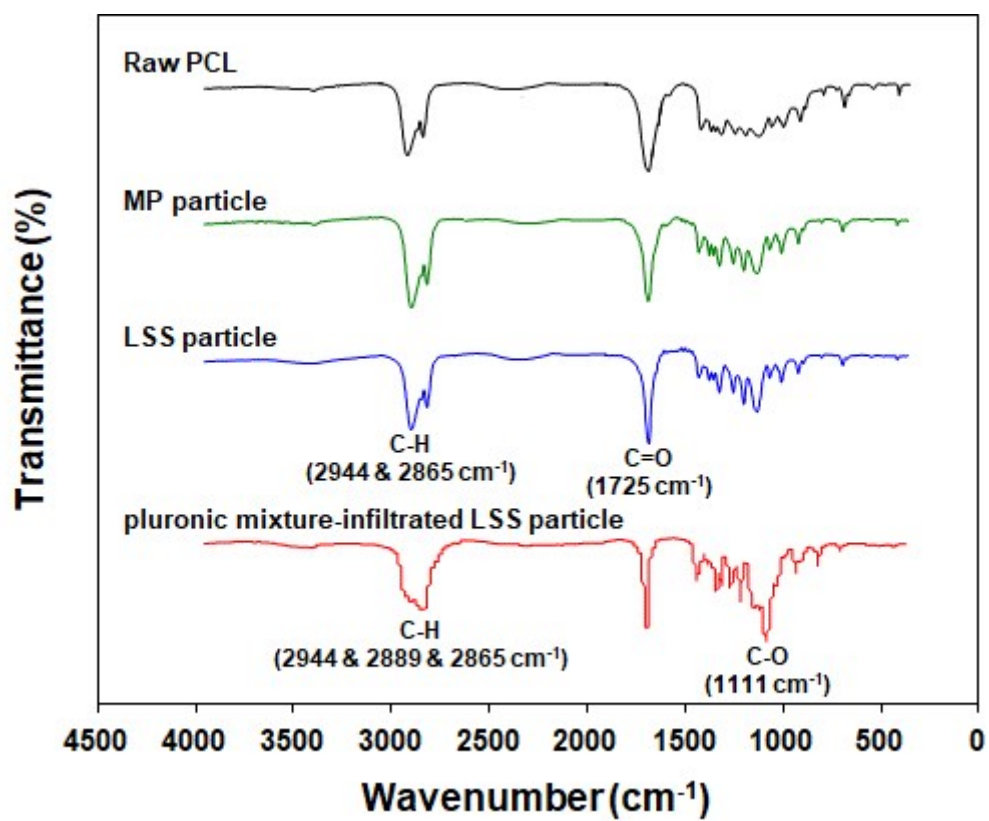

**Figure S2.** FTIR spectra of LSS particles, pluronic mixture-infiltrated LSS particles, MP particles, and raw PCL.

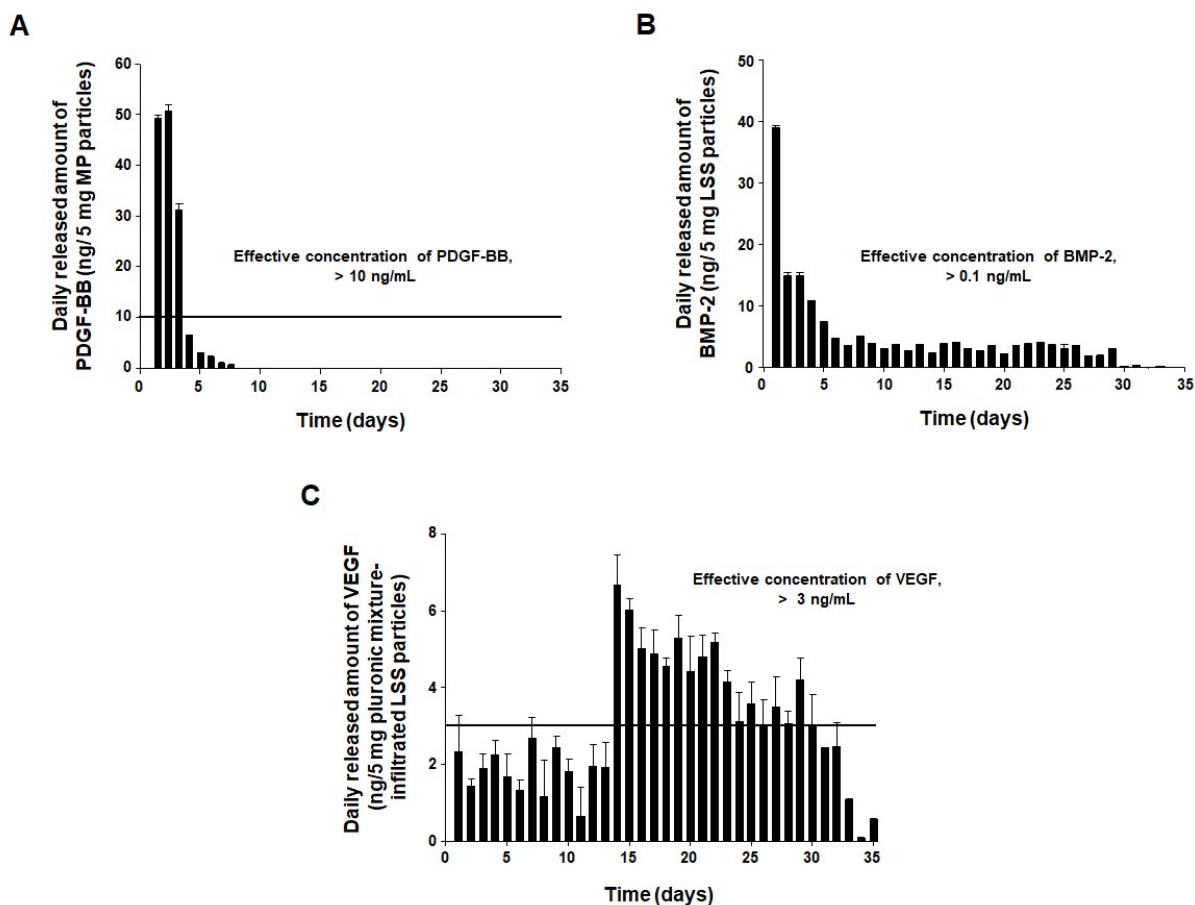

**Fig. S3** Daily release behavior of PDGF-BB, BMP-2, and VEGF from MP, LSS, and pluronic mixture-infiltrated LSS particles, respectively. (A) PDGF-BB was released from MP particles for 3 days (fast release) at an effective concentration to induce cell migration (>10 ng/mL). (B) BMP-2 was continuously released from LSS particles for 34 days (continuous release) at an effective concentration to induce osteogenic differentiation (> 0.1 ng/mL). (C) The pluronic mixture-infiltrated LSS particles showed the delayed/continuous release of VEGF (continuous release at an effective concentration for angiogenic differentiation after 14 days (> 3 ng/mL)).

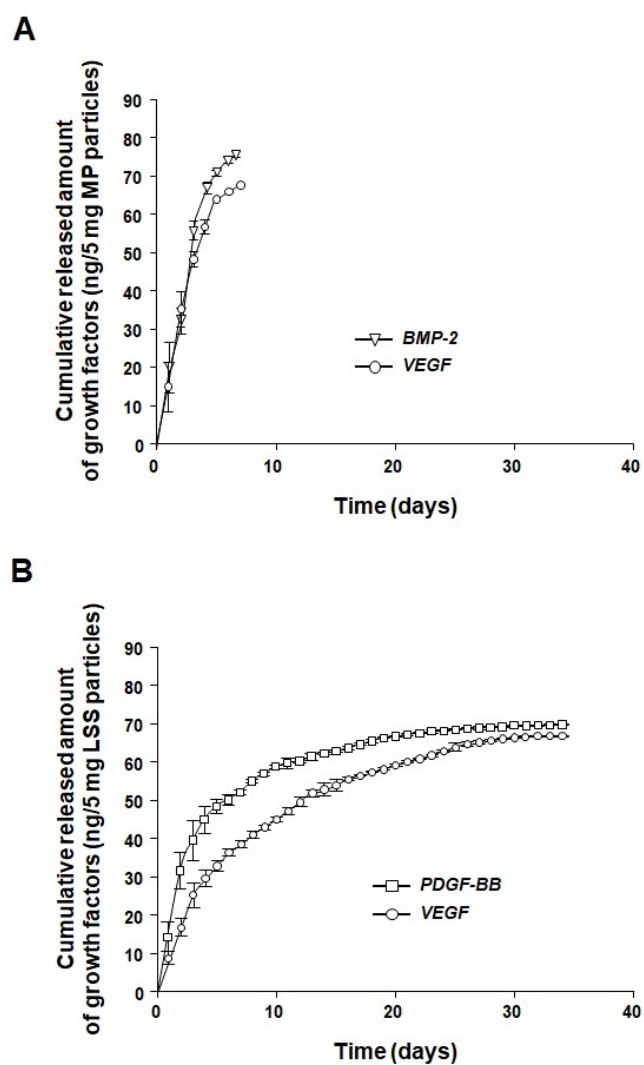

**Fig. S4** Cumulative release behavior of growth factors from MP and LSS. (A) MP particles showed fast release of BMP-2 and VEGF within  $\sim 7$  days, and (B) LSS particles allowed continuous release PDGF-BB and VEGF over 30 days.
